# Supplementary material
Source: HighWire-hosted journal article supplement (https://qdcxjkg.com/highwire/filestream/112858/field_highwire_adjunct_files/4/Figure_5.pdf)

**Fig.3**

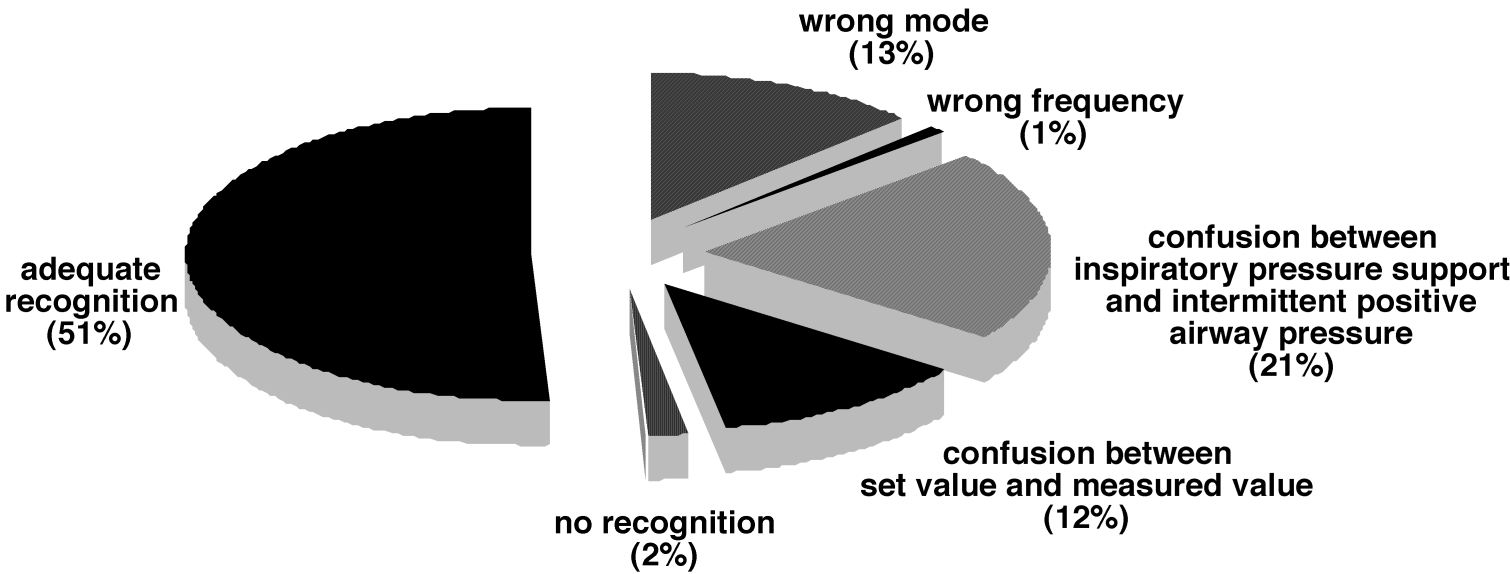

Supplement: Figure_5.pdf [file Figure_5.pdf]
